# Supplementary material for: The structure of behavioral variation within a genotype
Source: eLife. 2021 Oct 19;10:e64988. doi: 10.7554/eLife.64988 (PMC8526060; doi:10.7554/eLife.64988)
Supplement: Supplementary file 1. — Assays varied in the number of metrics collected, with all assays including measurement of at least one metric repeated in another assay. In total, the assays featured four distinct arena geometries and three distinct experiment durations ranging from 15 min to 21 hr. A minimum activity criteria was applied to individuals for inclusion in the analysis from each assay, with the specific criteria depending on which metric most closely approximated activity for any particular assay. [file elife-64988-supp1.xlsx]

## Sheet: table_s1
Name	Description	Metrics Collected	Arena Geometry	Throughput	Duration	Activity Inclusion Criteria
Activity Screening	Activity measurement profiling at the start of the decathlon experiment used to narrow future testing from a cohort of 288 flies to the most active 192 flies	circling bias, turn bias, choice number, turn clumpiness, hand switchiness, mean speed, bout number, bout length, bout clumpiness	Y-shaped arena with arms equally spaced apart at 120 degrees (12.7mm length for each maze arm)	96 flies per behavioral box	2 hrs	highest 192 choice number
Arena Circling	Open exploration of circular arena.	circling bias, mean speed, bout number, bout length, bout clumpiness	circular (28mm diameter)	48 flies per behavioral box	2 hrs	mean speed > centroid error
Circadian	Overnight activity level monitoring on food.	circling bias, mean speed, bout number, bout length, bout clumpiness, gravitactic index	96-multiwell plate (6.8mm diameter, 10.5mm depth)	96 flies per behavioral box	20-21 hrs	mean speed > centroid error
LED Y-maze Phototaxis	Discrete two-choice (light or no light) phototactic assay. Choices are scored as turns toward or away from a lit arm of the maze and as turns to the right or left of the choice point.	circling bias, turn bias, photoBias, choice number, turn clumpiness, hand switchiness, photo switchiness, mean speed, bout number, bout length, bout clumpiness	Y-shaped arena with LEDs at the end of each arm (12.7mm length for each maze arm)	72 flies per behavioral box	2 hrs	choice number > 10
Olfactory Sensitivity	Odor vs no-odor adaptation assay measuring sensitivity to a low concentration (typically aversive) odorant	odor occupancy, preodor occupancy, turn bias, choice clumpiness, hand switchiness, choice number, mean speed	linear tunnels with odorant ports at either end and decision boundary in center	15 flies per experiment	15 min (3 min preodor, 12 min odor)	mean speed > centroid error
Optomotor	Optomotor response assay where flies are repeatedly targeted with a high-contrast rotating pinwheel stimulus projected onto the arena floor	circling bias, opto index, mean speed, trial number, bout number, bout length, bout clumpiness	circular (28mm diameter)	48 flies per behavioral box	2 hrs	mean speed > centroid error
Spatial Shade-Light	Phototaxis assay where dark and light occupancy are measured. Individual arenas are targeted with a half lit, half dark spatial pattern.	circling bias, mean speed, bout number, bout length, bout clumpiness, photo occupancy	circular (28mm diameter)	48 flies per behavioral box	2 hrs	mean speed > centroid error
Temporal Shade-Light	Phototaxis assay where dark and light occupancy are measured. Individual arenas are either fully dark or fully lit depending on fly position relative to an invisible virtual boundary.	circling bias, mean speed, bout number, bout length, bout clumpiness, photo occupancy	circular (28mm diameter)	48 flies per behavioral box	2 hrs	mean speed > centroid error
Y-maze	Discrete two-choice (right or left) locomotor handedness assay. Choices are scored as turns to the right or left of the choice point in a Y-shaped arena.	circling bias, turn bias, choice number, turn clumpiness, hand switchiness, mean speed, bout number, bout length, bout clumpiness	Y-shaped arena with arms equally spaced apart at 120 degrees (12.7mm length for each maze arm)	96 flies per behavioral box	2 hrs	choice number > 10

## Sheet: table_s2
Name	Metrics	Metric Number	PCs Retained	% Variance Captured
Activity	Circadian: bout length (1-10), bout number (1-10), mean speed (1-10) Arena Circling: bout length, bout number, mean speed Culling: trial number, mean speed LED Y-Maze: bout length, bout number, mean speed, trial number Olfaction: trial number, mean speed Optomotor: bout length, bout number, trial number, mean speed Shade-Light: bout length, bout number, trial number, mean speed Temporal Shade-Lig…	57	13	68.36
Bout Clumpiness	Circadian: bout clumpiness (1-10) Arena Circling: bout clumpiness Culling: bout clumpiness LED Y-Maze: bout clumpiness Optomotor: bout clumpiness Shade-Light: bout clumpiness Temporal Shade-Light: bout clumpiness Y-Maze: bout clumpiness	16	2	43.55
Gravitaxis	Circadian: gravitaxis (1-10)	10	2	57.72
Clumpiness	Culling: turn clumpiness LED Y-Maze: turn clumpiness Olfaction: turn clumpiness Temporal Shade-Light: choice clumpiness Y-Maze: turn clumpiness	5	5	100
Switchiness	Culling: hand switchiness LED Y-Maze: hand switchiness, light switchiness Olfaction: hand switchiness Y-Maze: hand switchiness	5	5	100
Handedness	Arena Circling: circling Culling: right bias LED Y-Maze: right bias Olfaction: right bias Shade-Light: circling Temporal Shade-Light: circling Y-Maze: right bias	8	4	65.02
Circadian Handedness	Circadian: circling (1-10)	10	1	55.11
Optomotor Handedness	Optomotor: circling	1	1	100
Phototaxis	LED Y-Maze: light bias Shade-Light: light occupancy Temporal Shade-Light: light occupancy	3	3	100
Optomotor Index	Optomotor: index	1	1	100
Odor Sensitivity	Olfaction: odor occupancy	1	1	100

## Sheet: table_s3
Name	Description	Scale	Calculation	Assay	A Priori Group	Incl. Criteria
Activity Screen choice number	Total number of turns through the arena center	0 to inf	sum[ turns ]	Activity Screen	Activity	2003-01-02
Activity Screen mean speed	Average frame-to-frame speed over the duration of the experiment	0 to inf (mm/sec)	mean[ Δ_position / Δ_time ]	Activity Screen	Activity	2003-01-02
Arena mean speed	Average frame-to-frame speed over the duration of the experiment	0 to inf (mm/sec)	mean[ Δ_position / Δ_time ]	Arena	Activity	2003-01-02
Arena bout number	Total number of movement bouts over the duration of the experiment	0 to inf	sum[ bouts ]	Arena	Activity	2003-01-02
Arena bout length	Average length of movement bouts over the duration of the experiment	0 to inf (mm)	mean[ bout_len ]	Arena	Activity	2003-01-02
Circadian mean speed (1)	Average frame-to-frame speed over the duration of the experiment	0 to inf (mm/sec)	mean[ Δ_position / Δ_time ]	Circadian	Activity	2003-01-02
Circadian bout number (1)	Total number of movement bouts over the duration of the experiment	0 to inf	sum[ bouts ]	Circadian	Activity	2003-01-02
Circadian bout length (1)	Average length of movement bouts over the duration of the experiment	0 to inf (mm)	mean[ bout_len ]	Circadian	Activity	2003-01-02
Circadian mean speed (2)	Average frame-to-frame speed over the duration of the experiment	0 to inf (mm/sec)	mean[ Δ_position / Δ_time ]	Circadian	Activity	2003-01-02
Circadian bout number (2)	Total number of movement bouts over the duration of the experiment	0 to inf	sum[ bouts ]	Circadian	Activity	2003-01-02
Circadian bout length (2)	Average length of movement bouts over the duration of the experiment	0 to inf (mm)	mean[ bout_len ]	Circadian	Activity	2003-01-02
Circadian mean speed (3)	Average frame-to-frame speed over the duration of the experiment	0 to inf (mm/sec)	mean[ Δ_position / Δ_time ]	Circadian	Activity	2003-01-02
Circadian bout number (3)	Total number of movement bouts over the duration of the experiment	0 to inf	sum[ bouts ]	Circadian	Activity	2003-01-02
Circadian bout length (3)	Average length of movement bouts over the duration of the experiment	0 to inf (mm)	mean[ bout_len ]	Circadian	Activity	2003-01-02
Circadian mean speed (4)	Average frame-to-frame speed over the duration of the experiment	0 to inf (mm/sec)	mean[ Δ_position / Δ_time ]	Circadian	Activity	2003-01-02
Circadian bout number (4)	Total number of movement bouts over the duration of the experiment	0 to inf	sum[ bouts ]	Circadian	Activity	2003-01-02
Circadian bout length (4)	Average length of movement bouts over the duration of the experiment	0 to inf (mm)	mean[ bout_len ]	Circadian	Activity	2003-01-02
Circadian mean speed (5)	Average frame-to-frame speed over the duration of the experiment	0 to inf (mm/sec)	mean[ Δ_position / Δ_time ]	Circadian	Activity	2003-01-02
Circadian bout number (5)	Total number of movement bouts over the duration of the experiment	0 to inf	sum[ bouts ]	Circadian	Activity	2003-01-02
Circadian bout length (5)	Average length of movement bouts over the duration of the experiment	0 to inf (mm)	mean[ bout_len ]	Circadian	Activity	2003-01-02
Circadian mean speed (6)	Average frame-to-frame speed over the duration of the experiment	0 to inf (mm/sec)	mean[ Δ_position / Δ_time ]	Circadian	Activity	2003-01-02
Circadian bout number (6)	Total number of movement bouts over the duration of the experiment	0 to inf	sum[ bouts ]	Circadian	Activity	2003-01-02
Circadian bout length (6)	Average length of movement bouts over the duration of the experiment	0 to inf (mm)	mean[ bout_len ]	Circadian	Activity	2003-01-02
Circadian mean speed (7)	Average frame-to-frame speed over the duration of the experiment	0 to inf (mm/sec)	mean[ Δ_position / Δ_time ]	Circadian	Activity	2003-01-02
Circadian bout number (7)	Total number of movement bouts over the duration of the experiment	0 to inf	sum[ bouts ]	Circadian	Activity	2003-01-02
Circadian bout length (7)	Average length of movement bouts over the duration of the experiment	0 to inf (mm)	mean[ bout_len ]	Circadian	Activity	2003-01-02
Circadian mean speed (8)	Average frame-to-frame speed over the duration of the experiment	0 to inf (mm/sec)	mean[ Δ_position / Δ_time ]	Circadian	Activity	2003-01-02
Circadian bout number (8)	Total number of movement bouts over the duration of the experiment	0 to inf	sum[ bouts ]	Circadian	Activity	2003-01-02
Circadian bout length (8)	Average length of movement bouts over the duration of the experiment	0 to inf (mm)	mean[ bout_len ]	Circadian	Activity	2003-01-02
Circadian mean speed (9)	Average frame-to-frame speed over the duration of the experiment	0 to inf (mm/sec)	mean[ Δ_position / Δ_time ]	Circadian	Activity	2003-01-02
Circadian bout number (9)	Total number of movement bouts over the duration of the experiment	0 to inf	sum[ bouts ]	Circadian	Activity	2003-01-02
Circadian bout length (9)	Average length of movement bouts over the duration of the experiment	0 to inf (mm)	mean[ bout_len ]	Circadian	Activity	2003-01-02
Circadian mean speed (10)	Average frame-to-frame speed over the duration of the experiment	0 to inf (mm/sec)	mean[ Δ_position / Δ_time ]	Circadian	Activity	2003-01-02
Circadian bout number (10)	Total number of movement bouts over the duration of the experiment	0 to inf	sum[ bouts ]	Circadian	Activity	2003-01-02
Circadian bout length (10)	Average length of movement bouts over the duration of the experiment	0 to inf (mm)	mean[ bout_len ]	Circadian	Activity	2003-01-02
LED Y-Maze choice number	Total number of turns through the arena center	0 to inf	sum[ turns ]	LED Y-Maze	Activity	2003-01-02
LED Y-Maze mean speed	Average frame-to-frame speed over the duration of the experiment	0 to inf (mm/sec)	mean[ Δ_position / Δ_time ]	LED Y-Maze	Activity	2003-01-02
LED Y-Maze bout number	Total number of movement bouts over the duration of the experiment	0 to inf	sum[ bouts ]	LED Y-Maze	Activity	2003-01-02
LED Y-Maze bout length	Average length of movement bouts over the duration of the experiment	0 to inf (mm)	mean[ bout_len ]	LED Y-Maze	Activity	2003-01-02
Odor Sensitivity choice number	Number of crossings from the clean air side to the odor side	0 to inf	sum[ crossings ]	Odor Sensitivity	Activity	2003-01-02
Odor Sensitivity mean speed	Average frame-to-frame speed over the duration of the experiment	0 to inf (mm/sec)	mean[ Δ_position / Δ_time ]	Odor Sensitivity	Activity	2003-01-02
Optomotor mean speed	Average frame-to-frame speed over the duration of the experiment	0 to inf (mm/sec)	mean[ Δ_position / Δ_time ]	Optomotor	Activity	2003-01-02
Optomotor trial number	Number of optomotor stimuli triggered by the animal (i.e. animal moving, away from arena, and minimum intertrial interval exceeded)	0 to 1200 (max possible)	sum[ trials ]	Optomotor	Activity	2003-01-02
Optomotor bout number	Total number of movement bouts over the duration of the experiment	0 to inf	sum[ bouts ]	Optomotor	Activity	2003-01-02
Optomotor bout length	Average length of movement bouts over the duration of the experiment	0 to inf (mm)	mean[ bout_len ]	Optomotor	Activity	2003-01-02
Spatial Shade-light trial number	Number of 10 minute intervals where the fly moved out of the starting boundary zone	0 to 12 (max possible)	sum[ trials ]	Spatial Shade-light	Activity	2003-01-02
Spatial Shade-light mean speed	Average frame-to-frame speed over the duration of the experiment	0 to inf (mm/sec)	mean[ Δ_position / Δ_time ]	Spatial Shade-light	Activity	2003-01-02
Spatial Shade-light bout number	Total number of movement bouts over the duration of the experiment	0 to inf	sum[ bouts ]	Spatial Shade-light	Activity	2003-01-02
Spatial Shade-light bout length	Average length of movement bouts over the duration of the experiment	0 to inf (mm)	mean[ bout_len ]	Spatial Shade-light	Activity	2003-01-02
Temporal Shade-light trial number	Total number of trials initiated by crossing virtual border	0 to inf	sum[ trials ]	Temporal Shade-light	Activity	2003-01-02
Temporal Shade-light mean speed	Average frame-to-frame speed over the duration of the experiment	0 to inf (mm/sec)	mean[ Δ_position / Δ_time ]	Temporal Shade-light	Activity	2003-01-02
Temporal Shade-light bout number	Total number of movement bouts over the duration of the experiment	0 to inf	sum[ bouts ]	Temporal Shade-light	Activity	2003-01-02
Temporal Shade-light bout length	Average length of movement bouts over the duration of the experiment	0 to inf (mm)	mean[ bout_len ]	Temporal Shade-light	Activity	2003-01-02
Y-Maze choice number	Total number of turns through the arena center	0 to inf	sum[ turns ]	Y-Maze	Activity	2003-01-02
Y-Maze mean speed	Average frame-to-frame speed over the duration of the experiment	0 to inf (mm/sec)	mean[ Δ_position / Δ_time ]	Y-Maze	Activity	2003-01-02
Y-Maze bout number	Total number of movement bouts over the duration of the experiment	0 to inf	sum[ bouts ]	Y-Maze	Activity	2003-01-02
Y-Maze bout length	Average length of movement bouts over the duration of the experiment	0 to inf (mm)	mean[ bout_len ]	Y-Maze	Activity	2003-01-02
Arena bout clumpiness	Score of the regularity or irregularity of timing between movement bouts	0 to inf	stddev[ interbout_interval ] * n_bouts / exp_duration	Arena	Bout Clumpiness	2021-01-02
Circadian bout clumpiness (1)	Score of the regularity or irregularity of timing between movement bouts	0 to inf	stddev[ interbout_interval ] * n_bouts / exp_duration	Circadian	Bout Clumpiness	2021-01-02
Circadian bout clumpiness (2)	Score of the regularity or irregularity of timing between movement bouts	0 to inf	stddev[ interbout_interval ] * n_bouts / exp_duration	Circadian	Bout Clumpiness	2021-01-02
Circadian bout clumpiness (3)	Score of the regularity or irregularity of timing between movement bouts	0 to inf	stddev[ interbout_interval ] * n_bouts / exp_duration	Circadian	Bout Clumpiness	2021-01-02
Circadian bout clumpiness (4)	Score of the regularity or irregularity of timing between movement bouts	0 to inf	stddev[ interbout_interval ] * n_bouts / exp_duration	Circadian	Bout Clumpiness	2021-01-02
Circadian bout clumpiness (5)	Score of the regularity or irregularity of timing between movement bouts	0 to inf	stddev[ interbout_interval ] * n_bouts / exp_duration	Circadian	Bout Clumpiness	2021-01-02
Circadian bout clumpiness (6)	Score of the regularity or irregularity of timing between movement bouts	0 to inf	stddev[ interbout_interval ] * n_bouts / exp_duration	Circadian	Bout Clumpiness	2021-01-02
Circadian bout clumpiness (7)	Score of the regularity or irregularity of timing between movement bouts	0 to inf	stddev[ interbout_interval ] * n_bouts / exp_duration	Circadian	Bout Clumpiness	2021-01-02
Circadian bout clumpiness (8)	Score of the regularity or irregularity of timing between movement bouts	0 to inf	stddev[ interbout_interval ] * n_bouts / exp_duration	Circadian	Bout Clumpiness	2021-01-02
Circadian bout clumpiness (9)	Score of the regularity or irregularity of timing between movement bouts	0 to inf	stddev[ interbout_interval ] * n_bouts / exp_duration	Circadian	Bout Clumpiness	2021-01-02
Circadian bout clumpiness (10)	Score of the regularity or irregularity of timing between movement bouts	0 to inf	stddev[ interbout_interval ] * n_bouts / exp_duration	Circadian	Bout Clumpiness	2021-01-02
LED Y-Maze bout clumpiness	Score of the regularity or irregularity of timing between movement bouts	0 to inf	stddev[ interbout_interval ] * n_bouts / exp_duration	LED Y-Maze	Bout Clumpiness	2021-01-02
Optomotor bout clumpiness	Score of the regularity or irregularity of timing between movement bouts	0 to inf	stddev[ interbout_interval ] * n_bouts / exp_duration	Optomotor	Bout Clumpiness	2021-01-02
Spatial Shade-light bout clumpiness	Score of the regularity or irregularity of timing between movement bouts	0 to inf	stddev[ interbout_interval ] * n_bouts / exp_duration	Spatial Shade-light	Bout Clumpiness	2021-01-02
Temporal Shade-light bout clumpiness	Score of the regularity or irregularity of timing between movement bouts	0 to inf	stddev[ interbout_interval ] * n_bouts / exp_duration	Temporal Shade-light	Bout Clumpiness	2021-01-02
Y-Maze bout clumpiness	Score of the regularity or irregularity of timing between movement bouts	0 to inf	stddev[ interbout_interval ] * n_bouts / exp_duration	Y-Maze	Bout Clumpiness	2021-01-02
Circadian circling bias (1)	Index of clockwise versus counter-clockwise walking (CW = -1, CCW = 1)	-1 to 1 (CW = -1, CCW = 1)	-sin[ avg_circum_vel ]	Circadian	Circadian Circling	1
Circadian circling bias (2)	Index of clockwise versus counter-clockwise walking (CW = -1, CCW = 1)	-1 to 1 (CW = -1, CCW = 1)	-sin[ avg_circum_vel ]	Circadian	Circadian Circling	1
Circadian circling bias (3)	Index of clockwise versus counter-clockwise walking (CW = -1, CCW = 1)	-1 to 1 (CW = -1, CCW = 1)	-sin[ avg_circum_vel ]	Circadian	Circadian Circling	1
Circadian circling bias (4)	Index of clockwise versus counter-clockwise walking (CW = -1, CCW = 1)	-1 to 1 (CW = -1, CCW = 1)	-sin[ avg_circum_vel ]	Circadian	Circadian Circling	1
Circadian circling bias (5)	Index of clockwise versus counter-clockwise walking (CW = -1, CCW = 1)	-1 to 1 (CW = -1, CCW = 1)	-sin[ avg_circum_vel ]	Circadian	Circadian Circling	1
Circadian circling bias (6)	Index of clockwise versus counter-clockwise walking (CW = -1, CCW = 1)	-1 to 1 (CW = -1, CCW = 1)	-sin[ avg_circum_vel ]	Circadian	Circadian Circling	1
Circadian circling bias (7)	Index of clockwise versus counter-clockwise walking (CW = -1, CCW = 1)	-1 to 1 (CW = -1, CCW = 1)	-sin[ avg_circum_vel ]	Circadian	Circadian Circling	1
Circadian circling bias (8)	Index of clockwise versus counter-clockwise walking (CW = -1, CCW = 1)	-1 to 1 (CW = -1, CCW = 1)	-sin[ avg_circum_vel ]	Circadian	Circadian Circling	1
Circadian circling bias (9)	Index of clockwise versus counter-clockwise walking (CW = -1, CCW = 1)	-1 to 1 (CW = -1, CCW = 1)	-sin[ avg_circum_vel ]	Circadian	Circadian Circling	1
Circadian circling bias (10)	Index of clockwise versus counter-clockwise walking (CW = -1, CCW = 1)	-1 to 1 (CW = -1, CCW = 1)	-sin[ avg_circum_vel ]	Circadian	Circadian Circling	1
Activity Screen turn clumpiness	Score of the regularity or irregularity of timing between turns through the arena center	0 to inf	stddev[ interturn_interval ] / mean[ interturn_interval]	Activity Screen	Clumpiness	2003-01-02
LED Y-Maze turn clumpiness	Score of the regularity or irregularity of timing between turns through the arena center	0 to inf	stddev[ interturn_interval ] / mean[ interturn_interval]	LED Y-Maze	Clumpiness	2003-01-02
Odor Sensitivity turn clumpiness	Score of the regularity or irregularity of timing between turns through the arena center	0 to inf	stddev[ interturn_interval ] / mean[ interturn_interval]	Odor Sensitivity	Clumpiness	2003-01-02
Temporal Shade-light light clumpiness	Score of the regularity or irregularity of timing between trials initiated by crossing virtual border	0 to inf	stddev[ intertrial_interval ] * n_trials / exp_duration	Temporal Shade-light	Clumpiness	2003-01-02
Y-Maze turn clumpiness	Score of the regularity or irregularity of timing between turns through the arena center	0 to inf	stddev[ interturn_interval ] / mean[ interturn_interval]	Y-Maze	Clumpiness	2003-01-02
Circadian gravitactic index (1)	Index scoring arena floor versus arena ceiling occupancy	-1 to 1 (Floor = -1, Ceiling = 1)	[ time_on_ceiling - time_on_floor ] / exp_duration	Circadian	Gravitaxis	1
Circadian gravitactic index (2)	Index scoring arena floor versus arena ceiling occupancy	-1 to 1 (Floor = -1, Ceiling = 1)	[ time_on_ceiling - time_on_floor ] / exp_duration	Circadian	Gravitaxis	1
Circadian gravitactic index (3)	Index scoring arena floor versus arena ceiling occupancy	-1 to 1 (Floor = -1, Ceiling = 1)	[ time_on_ceiling - time_on_floor ] / exp_duration	Circadian	Gravitaxis	1
Circadian gravitactic index (4)	Index scoring arena floor versus arena ceiling occupancy	-1 to 1 (Floor = -1, Ceiling = 1)	[ time_on_ceiling - time_on_floor ] / exp_duration	Circadian	Gravitaxis	1
Circadian gravitactic index (5)	Index scoring arena floor versus arena ceiling occupancy	-1 to 1 (Floor = -1, Ceiling = 1)	[ time_on_ceiling - time_on_floor ] / exp_duration	Circadian	Gravitaxis	1
Circadian gravitactic index (6)	Index scoring arena floor versus arena ceiling occupancy	-1 to 1 (Floor = -1, Ceiling = 1)	[ time_on_ceiling - time_on_floor ] / exp_duration	Circadian	Gravitaxis	1
Circadian gravitactic index (7)	Index scoring arena floor versus arena ceiling occupancy	-1 to 1 (Floor = -1, Ceiling = 1)	[ time_on_ceiling - time_on_floor ] / exp_duration	Circadian	Gravitaxis	1
Circadian gravitactic index (8)	Index scoring arena floor versus arena ceiling occupancy	-1 to 1 (Floor = -1, Ceiling = 1)	[ time_on_ceiling - time_on_floor ] / exp_duration	Circadian	Gravitaxis	1
Circadian gravitactic index (9)	Index scoring arena floor versus arena ceiling occupancy	-1 to 1 (Floor = -1, Ceiling = 1)	[ time_on_ceiling - time_on_floor ] / exp_duration	Circadian	Gravitaxis	1
Circadian gravitactic index (10)	Index scoring arena floor versus arena ceiling occupancy	-1 to 1 (Floor = -1, Ceiling = 1)	[ time_on_ceiling - time_on_floor ] / exp_duration	Circadian	Gravitaxis	1
Activity Screen circling bias	Index of clockwise versus counter-clockwise walking (CW = -1, CCW = 1)	-1 to 1 (CW = -1, CCW = 1)	-sin[ avg_circum_vel ]	Activity Screen	Handedness	2003-01-02
Activity Screen turn bias	Fraction of turns toward the right arm of the arena	0 to 1 (Left = 0, Right = 1)	n_right_turns / n_total_turns	Activity Screen	Handedness	2003-01-02
Arena circling bias	Index of clockwise versus counter-clockwise walking (CW = -1, CCW = 1)	-1 to 1 (CW = -1, CCW = 1)	-sin[ avg_circum_vel ]	Arena	Handedness	2003-01-02
LED Y-Maze circling bias	Index of clockwise versus counter-clockwise walking (CW = -1, CCW = 1)	-1 to 1 (CW = -1, CCW = 1)	-sin[ avg_circum_vel ]	LED Y-Maze	Handedness	2003-01-02
LED Y-Maze turn bias	Fraction of turns toward the right arm of the arena	0 to 1 (Left = 0, Right = 1)	n_right_turns / n_total_turns	LED Y-Maze	Handedness	2003-01-02
Odor Sensitivity turn bias	Fraction of tunnel turn around events made to the right	0 to 1	n_right_turns / n_total_turns	Odor Sensitivity	Handedness	2003-01-02
Spatial Shade-light circling bias	Index of clockwise versus counter-clockwise walking (CW = -1, CCW = 1)	-1 to 1 (CW = -1, CCW = 1)	-sin[ avg_circum_vel ]	Spatial Shade-light	Handedness	2003-01-02
Temporal Shade-light circling bias	Index of clockwise versus counter-clockwise walking (CW = -1, CCW = 1)	-1 to 1 (CW = -1, CCW = 1)	-sin[ avg_circum_vel ]	Temporal Shade-light	Handedness	2003-01-02
Y-Maze circling bias	Index of clockwise versus counter-clockwise walking (CW = -1, CCW = 1)	-1 to 1 (CW = -1, CCW = 1)	-sin[ avg_circum_vel ]	Y-Maze	Handedness	2003-01-02
Y-Maze turn bias	Fraction of turns toward the right arm of the arena	0 to 1 (Left = 0, Right = 1)	n_right_turns / n_total_turns	Y-Maze	Handedness	2003-01-02
Odor Sensitivity odor occupancy	Fraction of time spent in odor	0 to 1	time_in_odor / exp_duration	Odor Sensitivity	Odor Sensitivity	4
Odor Sensitivity preodor occupancy	Fraction of time spent on odor size before odor presentation (i.e. baseline occupancy)	0 to 1	time_on_odor_size / exp_duration	Odor Sensitivity	Odor Sensitivity	4
Optomotor circling bias	Index of clockwise versus counter-clockwise walking (CW = -1, CCW = 1)	-1 to 1 (CW = -1, CCW = 1)	-sin[ avg_circum_vel ]	Optomotor	OptoHandedness	5
Optomotor optomotor index	Index of rotational motion with or against the rotational direction of the stimulus	-1 to 1 (against = -1, with = 1)	[ nframes_with - nframes_against ] / [ nframes_with + nframes_against ]	Optomotor	Optomotor Index	5
LED Y-Maze photo bias	Fraction of turns toward the lit arm of the arena	0 to 1 (Dark = 0, Light = 1)	n_light_turns / n_total_turns	LED Y-Maze	Phototaxis	4
Spatial Shade-light photo occupancy	Fraction of time spent in the light	0 to 1 (Dark = 0, Light = 1)	time_in_light / exp_duration	Spatial Shade-light	Phototaxis	4
Temporal Shade-light photo occupancy	Fraction of time spent in the light	0 to 1 (Dark = 0, Light = 1)	time_in_light / exp_duration	Temporal Shade-light	Phototaxis	4
Activity Screen turn switchiness	Score of the regularity or irregularity of alternating between left and right turns	0 to inf	n_switches / [ 2 * frac_right * frac_left * n_turns ]	Activity Screen	Switchiness	2003-01-02
LED Y-Maze turn switchiness	Score of the regularity or irregularity of alternating between left and right turns	0 to inf	n_switches / [ 2 * frac_right * frac_left * n_turns ]	LED Y-Maze	Switchiness	2003-01-02
LED Y-Maze light switchiness	Score of the regularity or irregularity of alternating between dark and light turns	0 to inf	n_switches / [ 2 * frac_right * frac_left * n_turns ]	LED Y-Maze	Switchiness	2003-01-02
Odor Sensitivity turn switchiness	Score of the regularity or irregularity of alternating between left and right turns	0 to inf	n_switches / [ 2 * frac_right * frac_left * n_turns ]	Odor Sensitivity	Switchiness	2003-01-02
Y-Maze turn switchiness	Score of the regularity or irregularity of alternating between left and right turns	0 to inf	n_switches / [ 2 * frac_right * frac_left * n_turns ]	Y-Maze	Switchiness	2003-01-02

## Sheet: table_s4
Targeted Neurons	Gal4 Lines	Source
P-FN3	SS00079, SS00406, SS02255, SS02221, SS00007, SS02304, SS00083	Gift from Tanya Wolff and Gerry Rubin
P-FN4	SS00161, SS00078, SS00019, SS00082, SS00083	Gift from Tanya Wolff and Gerry Rubin
P-FN5	SS02243, SS02209, SS02211, SS00082	Gift from Tanya Wolff and Gerry Rubin
P-EN	SS02241, SS02268, SS02232	Gift from Tanya Wolff and Gerry Rubin
P-EG	SS00097	Gift from Tanya Wolff and Gerry Rubin
E-PG	SS00090, SS00131, SS02258	Gift from Tanya Wolff and Gerry Rubin
E-PG9	SS04781, SS04782, SS02374	Gift from Tanya Wolff and Gerry Rubin
P-F-gall	SS02267, SS02271	Gift from Tanya Wolff and Gerry Rubin
P-F-ROB	SS02192, SS02293	Gift from Tanya Wolff and Gerry Rubin
PF-CreL	SS02252, SS02214	Gift from Tanya Wolff and Gerry Rubin
PsL-PB	SS02216, SS02200	Gift from Tanya Wolff and Gerry Rubin
PBCap	SS04775	Gift from Tanya Wolff and Gerry Rubin
PBInt	SS02231, SS02235, SS00116	Gift from Tanya Wolff and Gerry Rubin
Ps-P	SS02296, SS00155, SS00153	Gift from Tanya Wolff and Gerry Rubin
PsIb-P	SS04769	Gift from Tanya Wolff and Gerry Rubin

## Sheet: table_s5
KEGG Pathway ID	Description	Class	Sub-class	Observed p-value	Avg. min. p-value	Gene hits	Predictive genes
dme00190	Oxidative phosphorylation	metabolism	energy	0.000304	9.6e-14	17	ATPsyndelta, ATPsynE, ATPsynF, ATPsynO, CG5037, COX5B, cype, levy, ND-18, ND-19, ND-20, ND-23, ND-24, ND-39, ND-ACP, ND-B16.6, ND-MWFE, Vha14-1, Vha16-1, Vha26, Vha55, Vha68-2, VhaAC45, VhaM9.7-b, VhaSFD
dme03010	Ribosome	genetic information processing	translation	1.47e-07	1.4e-12	36	mRpS10, mRpS17, RpL10, RpL10Ab, RpL11, RpL12, RpL13, RpL13A, RpL17, RpL18, RpL18A, RpL24-like, RpL3, RpL32, RpL34a, RpL35A, RpL37a, RpL39, RpL4, RpL5, RpL7, RpL9, RpLP0, RpLP1, RpLP2, RpS13, RpS16, RpS19a, RpS23, RpS25, RpS3A, RpS4, RpS5a, RpS7, RpS9, sta
dme03050	Proteasome	genetic information processing	folding, sorting, and degradation	5.61e-15	4e-09	27	PI31, Pomp, Prosalpha2, Prosalpha3, Prosalpha4, Prosalpha5, Prosalpha6, Prosalpha7, Prosbeta1, Prosbeta2, Prosbeta3, Prosbeta4, Prosbeta5, Prosbeta7, REG, Rpn10, Rpn11, Rpn13, Rpn2, Rpn3, Rpn5, Rpn7, Rpn8, Rpt1, Rpt3, Rpt6, Sem1
dme01200	Carbon metabolism	metabolism	global	6.13e-05	5.2e-05	30	aay, AcCoAS, Acox57D-p, Ald1, Arc42, Cat, CG10932, CG17333, CG4390, CG5214, CG5577, CG6287, CG7430, CG8036, CG9527, Echs1, Eno, fbp, Fdh, Gapdh1, Gapdh2, Gdh, Got1, Irp-1B, Mdh1, Mdh2, Men, Men-b, Mtpalpha, muc, Nc73EF, PCB, Pdha, Pdhb, Pfk, Pgi, Pglym78, ppl, Scsalpha1, ScsbetaA, Shmt, Spat, Taldo, Tpi
dme00071	Fatty acid degradation	metabolism	lipids	4.89e-05	0.00016	12	Acox57D-p, Acsl, Aldh, Arc42, bgm, CG10932, CG31075, CG3902, CG7461, CG9527, Echs1, Fdh, Mtpalpha, Mtpbeta, yip2
dme01212	Fatty acid metabolism	metabolism	lipid	0.000207	0.0004	14	Acox57D-p, Acsl, Arc42, bgm, CG10932, CG3902, CG7461, CG9527, Desat1, Echs1, FASN1, Mtpalpha, Mtpbeta, Ppt2, yip2
dme04624	Toll and Imd signaling pathway	organismal systems	immune system	0.00114	0.0011	13	BomS1, BomS2, BomS3, cact, dl, hep, Jra, nec, PGRP-LA, PGRP-SA, Rel, Tak1, Uev1A
dme04745	Phototransduction - fly	organismal systems	sensory system	0.0293	0.0031	8	Act5C, Eip63F-1, Galphaq, Gbeta76C, inaC, inaD, ninaC, norpA, Plc21C, trp
dme00010	Glycolysis / Gluconeogenesis	metabolism	carbohydrate	0.00255	0.0036	14	AcCoAS, Ald1, Aldh, Aldh-III, CG31075, CG32444, CG7430, CG9008, Eno, fbp, Fdh, Gapdh1, Gapdh2, muc, Pdha, Pdhb, Pepck2, Pfk, Pgi, Pglym78, Pgm1, Tpi
dme00280	Valine, leucine and isoleucine degradation	metabolism	amino acid	0.00117	0.0044	10	Aldh, Arc42, CG10932, CG11241, CG1673, CG31075, CG3902, CG7430, Echs1, Gabat, Hmgs, Mtpalpha, Mtpbeta, scu, yip2
dme01230	Biosynthesis of amino acids	metabolism	amino acid	0.000404	0.005	18	aay, Ald1, Argl, Cbs, CG10184, CG1673, CG6287, CG8036, Eip55E, Eno, Gapdh1, Gapdh2, Got1, Gs1, Gs2, Hn, Irp-1B, P5CS, PCB, Pfk, Pglym78, Sam-S, Shmt, Taldo, Tpi
dme00270	Cysteine and methionine metabolism	metabolism	amino acid	0.000384	0.0051	14	Adi1, Ahcy, AhcyL1, Cbs, CG11241, CG1673, CG6287, Eip55E, Gclc, Gclm, Got1, Kyat, Mdh1, Mdh2, Mtap, Sam-S, SamDC
dme00640	Propanoate metabolism	metabolism	carbohydrate	0.000424	0.0051	10	AcCoAS, Acox57D-p, Arc42, CG10932, CG7430, CG9527, Echs1, Gabat, Mtpalpha, Scsalpha1, ScsbetaA
dme00620	Pyruvate metabolism	metabolism	carbohydrate	0.00126	0.0057	9	AcCoAS, Aldh, CG10932, CG31075, CG7430, Mdh1, Mdh2, Men, Men-b, muc, PCB, Pdha, Pdhb, Pepck2, tzn
dme00630	Glyoxylate and dicarboxylate metabolism	metabolism	carbohydrate	0.00382	0.0079	10	AcCoAS, Cat, CG10932, CG5577, CG7430, Gs1, Gs2, Irp-1B, Mdh1, Mdh2, ppl, Shmt, Spat
dme00250	Alanine, aspartate and glutamate metabolism	metabolism	amino acid	0.00226	0.014	11	Argl, CG11241, CG8132, Gabat, Gad1, Gdh, Got1, Gs1, Gs2, P5CDh1, Prat2, Spat
dme00983	Drug metabolism - other enzymes	metabolism	xenobiotics degradation	0.0138	0.015	13	CG15117, CG6330, CG8360, GstD2, GstE1, GstE12, GstE13, GstE2, GstE3, GstE6, GstO1, l(2)k01209, pyd3, Ugt316A1, Ugt36E1, Ugt36F1, Ugt49B1
dme04144	Endocytosis	cellular processes	transport and catabolism	0.012	0.018	21	Arf102F, ArfGAP1, Arpc4, Arpc5, CenB1A, Chc, cpb, Egfr, EndoA, Gprk2, Ist1, Lerp, Rab11, Rab5, Sec71, shi, Smox, Src64B, Vps36, Vps37B, Vps4, Vps60, WASp
dme00980	Metabolism of xenobiotics by cytochrome P450	metabolism	xenobiotics degradation	0.0257	0.023	8	Aldh-III, Fdh, GstD2, GstE1, GstE12, GstE13, GstE2, GstE3, GstE6, GstO1, Ugt316A1, Ugt36E1, Ugt36F1, Ugt49B1
dme04310	Wnt signaling pathway	environmental information processing	signal transduction	0.0342	0.024	15	Axn, CanA-14F, CkIalpha, CkIIalpha, dco, dlp, fz, inaC, Jra, nej, norpA, pk, Pka-C1, Plc21C, RhoL, Roc1a, sgg, Smox, Tak1, Vang
dme00982	Drug metabolism - cytochrome P450	metabolism	xenobiotics degradation	0.0257	0.024	8	Aldh-III, Fdh, GstD2, GstE1, GstE12, GstE13, GstE2, GstE3, GstE6, GstO1, Ugt316A1, Ugt36E1, Ugt36F1, Ugt49B1
dme03008	Ribosome biogenesis in eukaryotes	genetic information processing	translation	0.000939	0.025	14	Bka, CG1671, CG30349, CG4866, CkIIalpha, eIF6, Fib, NHP2, Non1, Nop56, Nop60B, Ns1, Ns2, pcm, Ran, Rat1
dme04145	Phagosome	cellular processes	transport and catabolism	0.0188	0.025	17	Act5C, betaTub97EF, CG11459, Cp1, Dlic, Lamp1, Rab5, RhoL, Sec61alpha, Sec61beta, Sec61gamma, Syx18, Vha14-1, Vha16-1, Vha26, Vha55, Vha68-2, VhaAC45, VhaM9.7-b, VhaSFD
dme00260	Glycine, serine and threonine metabolism	metabolism	amino acid	0.00378	0.026	9	aay, Cbs, CG10184, CG10361, CG11241, CG6287, CG7430, Eip55E, Pglym78, ppl, Shmt, Spat
dme04142	Lysosome	cellular processes	transport and catabolism	0.0107	0.036	12	cathD, CG11459, CG12163, CG15117, CG3376, CG4847, Chc, Cp1, Hexo1, Ids, Lamp1, Lerp, Ppt2, Sap-r, Tsp42Ed, Vha16-1, VhaAC45, VhaSFD
dme00650	Butanoate metabolism	metabolism	carbohydrate metabolism	0.00791	0.037	7	Arc42, CG10932, Echs1, Gabat, Gad1, Hmgs, L2HGDH, Mtpalpha
dme00052	Galactose metabolism	metabolism	carbohydrate	0.0447	0.038	6	CG32444, CG9436, Gale, Galt, Pfk, Pgm1, UGP
dme00970	Aminoacyl-tRNA biosynthesis	genetic information processing	translation	0.034	0.038	9	AlaRS, ArgRS, CysRS, GlnRS, GlyRS, MetRS, SerRS, ThrRS, TyrRS
dme00330	Arginine and proline metabolism	metabolism	amino acid metabolism	0.00955	0.04	8	Aldh, Argk, CG31075, Got1, Oat, Odc1, P5CDh1, P5CS, SamDC, slgA
dme00500	Starch and sucrose metabolism	metabolism	carbohydrate	0.0251	0.043	7	AGBE, CG5171, GlyP, Gyg, Pgi, Pgm1, Tps1, UGP
dme00380	Tryptophan metabolism	metabolism	amino acid	0.0341	0.045	6	Aldh, Cat, CG10932, CG31075, CG5214, CG7430, Echs1, Kyat, Mtpalpha, v
dme00981	Insect hormone biosynthesis	metabolism	terpenoids and polyketides	0.00444	0.062	5	Aldh, antdh, CG15739, CG31075, CG40485, Jheh2
dme00600	Sphingolipid metabolism	metabolism	lipid metabolism	0.0107	0.083	7	bwa, Cerk, CG10425, CG3376, ifc, laza, wun
dme03060	Protein export	genetic information processing	folding, sorting, and degradation	0.027	0.085	7	CG11110, Sec61alpha, Sec61beta, Sec61gamma, Spase25, Srp19, Srp9, SrpRalpha
dme04341	Hedgehog signaling pathway - fly	environmental information processing	signal transduction	0.00915	0.12	8	CkIalpha, dco, gish, Gprk2, Pka-C1, Roc1a, sgg, Su(fu)
dme04130	SNARE interactions in vesicular transport	genetic information processing	folding, sorting, and degradation	0.0106	0.12	7	Bet1, Gos28, Syb, Syx18, Syx8, Vti1b, Ykt6
dme03018	RNA degradation	genetic information processing	folding, sorting, and degradation	0.0213	0.18	8	CG2021, DCP1, Eno, PAN3, pcm, Pfk, Rat1, Rga, Tob
dme00860	Porphyrin and chlorophyll metabolism	metabolism	cofactors and vitamins	0.049	0.22	6	Cchl, CG15117, CG5037, Ppox, Ugt316A1, Ugt36E1, Ugt36F1, Ugt49B1
Decathlon - 2 (inbred)
KEGG Pathway ID	Description	Class	Sub-class	Observed p-value	Avg. min. p-value	Gene hits	Predictive genes
dme03010	Ribosome	genetic information processing	translation	4.2e-09	7.95e-11	31	mRpL12, mRpS17, RpL12, RpL13, RpL13A, RpL17, RpL18, RpL24, RpL28, RpL34b, RpL35, RpL37a, RpL37A, RpL7A, RpL8, RpL9, RpLP1, RpS15, RpS16, RpS17, RpS18, RpS19a, RpS2, RpS23, RpS25, RpS26, RpS29, RpS30, RpS4, sta
dme00190	Oxidative phosphorylation	metabolism	energy	3.3e-05	4.03e-08	22	ATPsynD, CG9065, COX4, COX5A, COX5B, cype, ND-19, ND-51, ND-75, ND-ASHI, ND-B14, ND-B14.5A, ND-B17.2, ND-PDSW, ox, RFeSP, SdhA, SdhB, SdhC, SdhD, UQCR-C2, UQCR-Q, Vha36-1
dme01200	Carbon metabolism	metabolism	global	0.0006	0.0037	17	Acox57D-p, Arc42, CG1640, CG5214, CG6287, CG8036, CG9527, fbp, Gapdh1, Hex-A, Mdh1, Men-b, PCB, ppl, ScsbetaA, SdhA, SdhB, SdhC, SdhD, Spat, Taldo
dme00071	Fatty acid degradation	metabolism	lipids	0.0006	0.0097	9	Acox57D-p, Arc42, CG3902, CG7461, CG9527, CPT2, Mtpbeta, yip2
dme01212	Fatty acid metabolism	metabolism	lipid	0.019	0.017	9	Acox57D-p, Arc42, CG3902, CG7461, CG9527, CPT2, Mtpbeta, yip2
dme00980	Metabolism of xenobiotics by cytochrome P450	metabolism	xenobiotics degradation	0.013	0.069	6	Acsl, GstD1, GstD2, GstT3, Ugt301D1, Ugt49B1
dme00982	Drug metabolism - cytochrome P450	metabolism	xenobiotics degradation	0.013	0.082	6	Acsl, GstD1, GstD2, GstT3, Ugt301D1, Ugt49B1
dme00983	Drug metabolism - other enzymes	metabolism	xenobiotics degradation	0.013	0.094	7	Acsl, GstD1, GstD2, GstE3, GstT3, Ugt301D1, Ugt49B1
dme00350	Tyrosine metabolism	metabolism	amino acid	0.02	0.1	5	Faa, GstZ2, Hpd, l(2)k01209
dme03060	Protein export	genetic information processing	folding, sorting, and degradation	0.032	0.13	4	hgo, Sec61beta, Sec61gamma, Trp1
dme00510	N-Glycan biosynthesis	metabolism	glycan biosynthesis	0.017	0.16	7	Alg2, Alg3, Alg7, Dpm1, OstDelta, twr, xit
dme04144	Endocytosis	cellular processes	transport and catabolism	0.024	0.17	14	ALiX, aPKC, Cbl, CG2224, CG33303, CG5498, Eps-15, par-6, PIP4K, Smurf, Stam, Usp8, Vps45
dme00534	Glycosaminoglycan biosynthesis - heparan sulfate / heparin	metabolism	glycan biosynthesis	0.038	0.19	5	AP-2mu, botv, Hs3st-B, Hs6st, Hsepi
dme00052	Galactose metabolism	metabolism	carbohydrate	0.043	0.21	4	CG10863, CG6083, GlcAT-I, Hex-A
dme00051	Fructose and mannose metabolism	metabolism	carbohydrate	0.043	0.29	4	CG10863, CG6083, fbp, GlcAT-I, Hex-A
dme00790	Folate biosynthesis	metabolism	cofactors and vitamins	0.043	0.31	5	Akr1B, CG10863, CG6083, GlcAT-I, se
Decathlon - 3 (outbred)
KEGG Pathway ID	Description	Class	Sub-class	Observed p-value	Avg. min. p-value	Gene hits	Predictive genes
dme00190	Oxidative phosphorylation	metabolism	energy	0.000431	8.1e-06	23	ATPsynB, ATPsynCF6, ATPsynF, ATPsynG, COX7C, COX8, cype, ND-15, ND-19, ND-B14, ND-B14.5A, ND-B14.7, ND-B16.6, ND-B17, ND-PDSW, SdhC, sun, UQCR-6.4, Vha14-1, Vha44, Vha55, Vha68-1, VhaPPA1-1
dme03010	Ribosome	genetic information processing	translation	0.000934	0.00016	19	mRpL2, mRpL22, mRpS17, mRpS9, RpL13, RpL15, RpL22, RpL26, RpL29, RpL32, RpL36A, RpL38, RpS20, RpS21, RpS25, RpS26, RpS27, RpS3, RpS30
dme01200	Carbon metabolism	metabolism	global	1.58e-05	0.000823	24	AcCoAS, ACOX1, CG6287, CG7430, CG8036, CG9527, fbp, Got2, Irp-1B, Mdh1, Men, Mtpalpha, PCB, Pgd, Pgi, Pglym78, Prps, Rpe, Rpi, SdhC, Shmt, Spat, Taldo, Zw
dme00030	Pentose phosphate	metabolism	carbohydrate	0.000506	0.00324	10	CG8036, fbp, Pgd, Pgi, Pgm1, Prps, Rpe, Rpi, Taldo, Zw
dme01230	Biosynthesis of amino acids	metabolism	amino acid	0.00431	0.00499	13	CG6287, CG8036, Got2, Hn, Irp-1B, PCB, Pglym78, Prps, Rpe, Rpi, Sam-S, Shmt, Taldo
dme00040	Pentose and glycuronate interconversions	metabolism	carbohydrate	0.00603	0.016	10	Akr1B, CG3534, CG3597, CG3609, CG7322, Rpe, sgl, Sodh-1, UGP, Ugt35B1
dme04745	Phototransduction - fly	organismal systems	sensory system	0.00391	0.02	10	Cam, Gbeta76C, Itpr, ninaC, ninaE, norpA, Pkc53E, Plc21C, rdgC, trp
dme00500	Starch and sucrose metabolism	metabolism	carbohydrate	0.00695	0.039	7	AGBE, CG5171, GlyP, GlyS, Pgi, Pgm1, UGP
dme00010	Glycolysis / Gluconeogenesis	metabolism	carbohydrate	0.0231	0.041	9	AcCoAS, CG31075, CG32444, CG7430, CG9008, fbp, Pgi, Pglym78, Pgm1
dme00620	Glyoxylate and dicarboxylate metabolism	metabolism	carbohydrate	0.0123	0.044	7	AcCoAS, CG7430, Gip, Irp-1B, Mdh1, Shmt, Spat
dme01212	Fatty acid metabolism	metabolism	lipid	0.0022	0.0494	9	ACC, ACOX1, Acsl, CG3902, CG9527, CPT2, Desat1, FASN1, Mtpalpha
dme04624	Toll and Imd signaling pathway	organismal systems	immune system	0.00437	0.051	11	BomS1, BomS2, BomS3, Dif, DptA, DptB, Drs, Dso1, PGRP-LE, PGRP-SB1, spz
dme00620	Pyruvate metabolism	metabolism	carbohydrate	0.027	0.066	7	ACC, AcCoAS, CG31075, CG7430, Mdh1, Men, PCB
dme00052	Galactose metabolism	metabolism	carbohydrate	0.0123	0.085	6	Akr1B, CG32444, CG7997, Gale, Pgm1, UGP
dme00071	Fatty acid degradation	metabolism	lipids	0.00325	0.086	7	ACOX1, Acsl, CG31075, CG3902, CG9527, CPT2, Mtpalpha
dme00640	Propanoate metabolism	metabolism	carbohydrate	0.0368	0.089	6	ACC, AcCoAS, ACOX1, CG7430, CG9527, Mtpalpha
dme00230	Purine metabolism	metabolism	nucleotide	0.0281	0.101	10	CG11089, CG32549, cN-IIIB, dnc, Pde9, Pfas, Pgm1, Prat2, Prps, ras
dme04070	Phosphatidylinositol signaling	environmental information processing	signal transduction	0.00473	0.117	14	Cam, Cds, CG34384, CG3530, CG42271, CG9391, EDTP, fwd, INPP5E, Itpr, norpA, Ocrl, Pkc53E, Plc21C
dme00562	Inositol phosphate metabolism	metabolism	carbohydrate	0.0126	0.129	9	CG3530, CG42271, CG9391, EDTP, fwd, INPP5E, norpA, Ocrl, Plc21C
dme04080	Neuroactive ligand-receptor interaction	environmental information processing	signal transduction	0.0268	0.179	6	5-HT1A, baz, CCKLR-17D1, GABA-B-R2, Lgr1, mAChR-B
dme00564	Glycerophospholipid metabolism	metabolism	lipid	0.0332	0.259	9	Cds, CG2201, CG3009, CG34384, Gpo1, iPLA2-VIA, nes, Pect, Pld3
dme04150	mTOR signaling pathway	environmental information processing	signal transduction	0.0297	0.294	10	Akt1, eIF4B, JhI-21, Mo25, Pkc53E, Vha14-1, Vha44, Vha55, Vha68-1, Wnt6
